# Supplementary material for: Keystone microbial taxa in the formation of stale aroma during pile fermentation of ripened Pu-erh tea
Source: Research Square preprint supplement (doi:10.21203/rs.3.rs-7653483/v1), 2025-11-12
Supplement: Supplementary file 1 [file 3cf97d49b9c8f9f5136fe052.docx]

**Supplementary Data**

**Keystone microbial taxa in the formation of stale aroma during pile fermentation of ripened Pu-erh tea**

Yiwei Wenga, Shiqiang Hea, Zhengfei Luob, Jin Suna, Qinghua Chenga, Yingjuan Chena*, Huarong Tonga*

a College of Food Science, Southwest University, Chongqing 400715, China

b Yunnan Key Laboratory of Tea Germplasm Conservation and Utilization in the Lancang River Basin, College of Biotechnology and Engineering, West Yunnan University, Lincang 677000, China

* Corresponding author.

College of Food Science, Southwest University, No. 2 Tiansheng Road, Beibei District, Chongqing, China.

E-mail addresses: cyj8@swu.edu.cn (Yingjuan Chen) and thuarong@126.com (Huarong Tong).

**Table S1** The moisture content of tea samples

| **Sample** | **Moisture content** |
| --- | --- |
| P1 | 44.1% |
| P2 | 43.6% |
| P3 | 38.4% |
| P4 | 29.5% |
| P5 | 29% |
| P6 | 18.6% |

The moisture content in the tea sample was determined using the 120°C rapid drying method. (National Standard of the People's Republic of China. 2016. National food safety standard determination of moisture in food. GB5003.9-2016.)

| **No.** | **Compounds** | **Cas** | **Relative content (μg/g, mean ± S.D; n = 3)** | | | | | | | | | | | | | | | | | | | | | | | |
| --- | --- | --- | --- | --- | --- | --- | --- | --- | --- | --- | --- | --- | --- | --- | --- | --- | --- | --- | --- | --- | --- | --- | --- | --- | --- | --- |
| **RM** | | | **P1** | | | **P2** | | | **P3** | | | **P4** | | | **P5** | | | **P6** | | | **RP** | | |
| **1** | **2** | **3** | **1** | **2** | **3** | **1** | **2** | **3** | **1** | **2** | **3** | **1** | **2** | **3** | **1** | **2** | **3** | **1** | **2** | **3** | **1** | **2** | **3** |
| 1 | 1-Pentanol | 71-41-0 | 0.045 | n.d.a | 0.024 | n.d. | n.d. | n.d. | n.d. | n.d. | n.d. | n.d. | n.d. | n.d. | n.d. | n.d. | n.d. | n.d. | n.d. | n.d. | n.d. | n.d. | n.d. | n.d. | n.d. | 0.000 |
| 2 | Hexanal | 66-25-1 | 0.015 | 0.014 | 0.013 | n.d. | 0.219 | 0.072 | 0.058 | 0.095 | 0.110 | 0.032 | 0.032 | 0.017 | n.d. | n.d. | n.d. | 0.061 | 0.050 | 0.060 | 0.003 | 0.032 | 0.100 | n.d. | n.d. | 0.000 |
| 3 | Hexane, 2,3,4-trimethyl- | 921-47-1 | n.d. | 0.003 | 0.002 | n.d. | n.d. | n.d. | n.d. | n.d. | n.d. | n.d. | n.d. | n.d. | n.d. | n.d. | n.d. | n.d. | n.d. | n.d. | n.d. | n.d. | n.d. | n.d. | n.d. | 0.000 |
| 4 | 2-Heptanol | 543-49-7 | n.d. | n.d. | n.d. | n.d. | 0.201 | 0.066 | 0.027 | 0.077 | 0.054 | n.d. | n.d. | n.d. | n.d. | n.d. | n.d. | n.d. | n.d. | n.d. | n.d. | n.d. | n.d. | n.d. | n.d. | 0.000 |
| 5 | Ethanone, 1-(3-methylenecyclopentyl)- | 54829-98-0 | n.d. | n.d. | n.d. | n.d. | 0.211 | 0.033 | 0.007 | 0.038 | 0.067 | 0.022 | 0.038 | 0.023 | 0.001 | 0.006 | 0.002 | 0.033 | 0.039 | 0.027 | 0.002 | 0.023 | 0.090 | 0.008 | 0.000 | 0.006 |
| 6 | 2-Hexene, 3,5,5-trimethyl- | 26456-76-8 | 0.052 | 0.028 | 0.017 | n.d. | n.d. | n.d. | n.d. | n.d. | n.d. | n.d. | n.d. | n.d. | n.d. | n.d. | n.d. | n.d. | n.d. | n.d. | n.d. | n.d. | n.d. | n.d. | n.d. | 0.000 |
| 7 | 1-Octen-3-ol | 3391-86-4 | 0.226 | 0.360 | 0.304 | n.d. | n.d. | n.d. | n.d. | n.d. | n.d. | n.d. | n.d. | n.d. | n.d. | n.d. | n.d. | n.d. | n.d. | n.d. | n.d. | n.d. | n.d. | n.d. | n.d. | 0.000 |
| 8 | 2-Octen-1-ol, (E)- | 18409-17-1 | n.d. | n.d. | n.d. | n.d. | n.d. | n.d. | n.d. | 0.019 | 0.027 | n.d. | n.d. | n.d. | n.d. | n.d. | n.d. | 0.035 | 0.032 | 0.018 | 0.002 | n.d. | 0.031 | n.d. | n.d. | 0.000 |
| 9 | 2-Isopropylidene-5-methylhex-4-enal | 3304-28-7 | n.d. | n.d. | n.d. | n.d. | n.d. | n.d. | 0.016 | 0.061 | 0.117 | 0.032 | 0.064 | 0.039 | 0.001 | 0.010 | 0.003 | 0.055 | 0.064 | 0.045 | 0.005 | 0.005 | 0.059 | 0.013 | 0.001 | 0.009 |
| 10 | Cyclohexene, 1-methyl-4-(1-methylethenyl) | 5989-54-8 | n.d. | n.d. | n.d. | n.d. | 0.016 | 0.049 | n.d. | 0.011 | 0.022 | n.d. | n.d. | n.d. | n.d. | n.d. | n.d. | n.d. | n.d. | n.d. | n.d. | n.d. | n.d. | n.d. | n.d. | 0.000 |
| 11 | Cyclohexanone, 2,2,6-trimethyl- | 2408-37-9 | 0.047 | 0.125 | 0.108 | n.d. | 0.095 | 0.042 | n.d. | 0.017 | 0.026 | n.d. | n.d. | n.d. | 0.000 | 0.001 | 0.001 | n.d. | n.d. | n.d. | n.d. | n.d. | n.d. | 0.008 | 0.001 | 0.000 |
| 12 | Decane, 3,7-dimethyl- | 17312-54-8 | 0.006 | n.d. | 0.017 | n.d. | n.d. | n.d. | n.d. | n.d. | n.d. | n.d. | n.d. | n.d. | n.d. | n.d. | n.d. | n.d. | n.d. | n.d. | n.d. | n.d. | n.d. | n.d. | n.d. | 0.000 |
| 13 | Isophorone | 78-59-1 | 0.012 | 0.028 | 0.022 | n.d. | n.d. | n.d. | n.d. | n.d. | n.d. | n.d. | n.d. | n.d. | n.d. | n.d. | n.d. | n.d. | n.d. | n.d. | n.d. | n.d. | n.d. | n.d. | n.d. | 0.000 |
| 14 | 7-Octen-2-ol, 2-methyl-6-methylene- | 543-39-5 | n.d. | n.d. | n.d. | n.d. | 0.049 | 0.022 | n.d. | n.d. | n.d. | 0.020 | 0.023 | 0.017 | 0.001 | 0.005 | 0.001 | 0.025 | 0.027 | 0.018 | n.d. | n.d. | n.d. | 0.005 | 0.000 | 0.003 |
| 15 | trans-Linalool oxide (furanoid) | 34995-77 -2 | n.d. | n.d. | n.d. | 0.232 | 3.557 | 2.642 | 0.465 | 1.542 | 2.978 | 0.847 | 1.856 | 1.084 | 0.030 | 0.217 | 0.053 | 0.921 | 1.112 | 0.798 | 0.034 | 0.463 | 1.703 | 0.184 | 0.013 | 0.123 |
| 16 | trans-Linalool oxide (furanoid) | 34995-77-2 | n.d. | n.d. | n.d. | 0.621 | 8.755 | 7.031 | 1.092 | 3.739 | 7.301 | 2.172 | 4.644 | 2.781 | 0.065 | 0.504 | 0.117 | 2.516 | 2.997 | 2.164 | 0.085 | 1.319 | 4.804 | 0.645 | 0.042 | 0.451 |
| 17 | Linalool | 78-70-6 | 0.219 | 0.403 | 0.314 | 0.567 | 21.083 | 5.969 | 1.121 | 5.405 | 7.805 | 0.963 | 2.120 | 1.165 | 0.098 | 0.572 | 0.180 | 1.105 | 1.373 | 0.757 | 0.041 | 0.257 | 1.045 | 0.034 | 0.004 | 0.032 |
| 18 | 2H-Pyran-3(4H)-one, 6-ethenyldihydro-2,2,6-trimethyl- | 33933-72-1 | n.d. | n.d. | n.d. | 0.068 | 1.975 | 1.179 | 0.187 | 0.888 | 1.608 | 0.689 | 1.572 | 1.006 | 0.051 | 0.286 | 0.085 | 1.215 | 1.525 | 1.022 | 0.067 | 0.625 | 2.381 | 0.429 | 0.037 | 0.296 |
| 19 | 1-Methylcycloheptanol | 3761-94-2 | n.d. | 0.067 | 0.051 | n.d. | n.d. | n.d. | n.d. | n.d. | n.d. | n.d. | n.d. | n.d. | n.d. | n.d. | n.d. | n.d. | n.d. | n.d. | n.d. | n.d. | n.d. | n.d. | n.d. | 0.000 |
| 20 | 1H-Pyrazole, 4,5-dihydro-5,5-dimethyl-4-isopropylidene- | 106251-09-6 | n.d. | n.d. | n.d. | n.d. | n.d. | n.d. | n.d. | n.d. | n.d. | n.d. | n.d. | n.d. | n.d. | n.d. | n.d. | 0.021 | 0.021 | 0.010 | 0.001 | 0.010 | 0.027 | 0.008 | 0.001 | 0.007 |
| 21 | Benzene, 1,2-dimethoxy- | 91-16-7 | n.d. | n.d. | n.d. | n.d. | n.d. | n.d. | 0.044 | 0.217 | 0.285 | 0.785 | 1.341 | 0.778 | 0.082 | 0.519 | 0.142 | 2.121 | 2.603 | 1.701 | 0.107 | 1.241 | 4.720 | 0.643 | 0.050 | 0.572 |
| 22 | (3R,6S)-2,2,6-Trimethyl-6-vinyltetrahydro-2H-pyran-3-ol | 39028-58-5 | n.d. | n.d. | n.d. | 0.049 | n.d. | 0.526 | 0.092 | 0.418 | 0.816 | 0.222 | 0.361 | 0.198 | 0.005 | 0.035 | 0.010 | 0.186 | 0.223 | 0.160 | 0.004 | 0.075 | 0.270 | 0.053 | 0.002 | 0.030 |
| 23 | Benzene, 1,3-bis(1-methylethyl)- | 99-62-7 | n.d. | n.d. | n.d. | n.d. | n.d. | n.d. | n.d. | n.d. | n.d. | n.d. | n.d. | n.d. | n.d. | n.d. | n.d. | n.d. | n.d. | n.d. | 0.001 | 0.011 | 0.040 | 0.011 | 0.000 | 0.004 |
| 24 | (3R,6S)-2,2,6-Trimethyl-6-vinyltetrahydro-2H-pyran-3-ol | 39028-58-5 | 0.018 | 0.036 | 0.040 | 0.121 | 1.606 | 1.289 | 0.292 | 1.334 | 2.603 | 0.802 | 1.403 | 0.812 | 0.018 | 0.141 | 0.001 | 0.786 | 0.901 | 0.661 | 0.014 | 0.251 | 0.926 | 0.098 | 0.005 | 0.070 |
| 25 | Terpinen-4-ol | 562-74-3 | n.d. | n.d. | n.d. | n.d. | 0.075 | 0.079 | 0.010 | 0.071 | 0.036 | 0.027 | 0.015 | 0.033 | 0.001 | 0.008 | 0.002 | 0.039 | 0.059 | 0.033 | 0.001 | 0.012 | 0.059 | 0.015 | 0.001 | 0.009 |
| 26 | .alpha.-Terpineol | 98-55-5 | 0.015 | n.d. | 0.012 | 0.077 | 1.341 | 0.523 | 0.176 | 1.244 | 1.859 | 0.357 | 0.847 | 0.417 | 0.028 | 0.185 | 0.050 | 0.620 | 0.758 | 0.446 | 0.022 | 0.213 | 0.824 | 0.137 | 0.010 | 0.115 |
| 27 | 1,3-Cyclohexadiene-1-carboxaldehyde, 2,6,6-trimethyl- | 116-26-7 | 0.021 | 0.030 | 0.026 | n.d. | n.d. | n.d. | n.d. | n.d. | n.d. | n.d. | n.d. | n.d. | n.d. | n.d. | n.d. | n.d. | n.d. | n.d. | n.d. | n.d. | n.d. | n.d. | n.d. | 0.000 |
| 28 | 1-Cyclohexene-1-carboxaldehyde, 2,6,6-trimethyl- | 432-25-7 | 0.041 | 0.087 | 0.072 | n.d. | 0.179 | 0.047 | 0.009 | 0.056 | 0.082 | n.d. | n.d. | n.d. | 0.002 | 0.007 | 0.003 | n.d. | n.d. | n.d. | n.d. | n.d. | n.d. | n.d. | n.d. | 0.000 |
| 29 | 4-Methyleneisophorone | 20548-00-9 | n.d. | n.d. | n.d. | n.d. | n.d. | n.d. | n.d. | n.d. | n.d. | n.d. | n.d. | n.d. | n.d. | n.d. | n.d. | 0.010 | 0.013 | 0.008 | 0.000 | 0.006 | n.d. | 0.009 | 0.000 | 0.006 |
| 30 | Bicyclo[2.2.1]hept-2-ene, 1,7,7-trimethyl- | 464-17-5 | n.d. | n.d. | n.d. | n.d. | n.d. | n.d. | 0.004 | 0.025 | 0.036 | 0.008 | 0.018 | 0.007 | 0.001 | 0.007 | 0.002 | 0.016 | 0.023 | 0.012 | 0.001 | 0.006 | 0.028 | 0.005 | 0.000 | 0.004 |
| 31 | 1,2,3-Trimethoxybenzene | 634-36-6 | n.d. | n.d. | n.d. | 0.028 | 0.016 | n.d. | 0.035 | 0.088 | 0.097 | 1.239 | 2.214 | 1.281 | 0.092 | 0.560 | 0.175 | 3.299 | 3.918 | 2.704 | 0.111 | 1.633 | 6.102 | 1.260 | 0.076 | 1.108 |
| 32 | 2-Methoxy-4,4-dimethyl-2-cyclohexen-1-one | 42117-32-8 | n.d. | n.d. | n.d. | n.d. | n.d. | n.d. | n.d. | n.d. | n.d. | 0.059 | 0.098 | 0.069 | 0.005 | 0.030 | 0.008 | 0.174 | 0.171 | 0.117 | 0.006 | 0.064 | n.d. | 0.108 | 0.006 | 0.097 |
| 33 | 2H-2,4a-Methanonaphthalene, 1,3,4,5,6,7-hexahydro-1,1,5,5-tetramethyl-, (2S)- | 1135-66-6 | 0.068 | 0.033 | 0.038 | n.d. | 2.568 | 0.189 | n.d. | 0.093 | 0.074 | 0.080 | 0.056 | 0.029 | 0.003 | 0.014 | 0.002 | 0.045 | 0.025 | 0.089 | n.d. | 0.042 | 0.057 | 0.074 | 0.002 | 0.031 |
| 34 | Decanoic acid, ethyl ester | 110-38-3 | 0.050 | 0.050 | 0.050 | 0.050 | 0.050 | 0.050 | 0.050 | 0.050 | 0.050 | 0.050 | 0.050 | 0.050 | 0.050 | 0.050 | 0.050 | 0.050 | 0.050 | 0.050 | 0.050 | 0.050 | 0.050 | 0.050 | 0.050 | 0.050 |
| 35 | alpha.-Ionone | 127-41-3 | 0.019 | 0.012 | 0.010 | n.d. | n.d. | n.d. | 0.000 | 0.053 | 0.060 | 0.050 | 0.038 | 0.018 | 0.001 | 0.014 | 0.001 | 0.012 | 0.014 | 0.027 | 0.001 | 0.005 | 0.011 | 0.040 | 0.001 | 0.022 |
| 36 | 2-Butanone, 4-(2,6,6-trimethyl-1-cyclohexen-1-yl)- | 17283-81-7 | n.d. | n.d. | n.d. | n.d. | n.d. | n.d. | 0.005 | 0.079 | 0.119 | 0.020 | 0.033 | 0.020 | 0.001 | 0.008 | 0.002 | 0.020 | 0.025 | 0.023 | 0.001 | 0.008 | 0.028 | 0.020 | 0.001 | 0.014 |
| 37 | trans-.beta.-Ionone | 79-77-6 | 0.017 | 0.016 | 0.012 | 0.000 | 0.038 | 0.000 | 0.005 | 0.021 | 0.037 | 0.018 | 0.008 | 0.005 | 0.001 | 0.004 | 0.001 | 0.012 | 0.013 | 0.028 | 0.001 | 0.005 | 0.018 | 0.009 | 0.001 | 0.007 |
| 38 | 3-Buten-2-one, 4-(2,2,6-trimethyl-7-oxabicyclo[4.1.0]hept-1-yl)- | 23267-57-4 | 0.011 | 0.015 | 0.011 | 0.000 | 0.521 | 0.025 | n.d. | n.d. | n.d. | 0.006 | 0.014 | 0.008 | 0.000 | 0.002 | 0.000 | 0.013 | 0.016 | 0.011 | 0.001 | 0.007 | 0.021 | 0.008 | 0.000 | 0.006 |
| 39 | Phenol, 3,5-bis(1,1-dimethylethyl)- | 1138-52-9 | 0.070 | 0.095 | 0.084 | 0.033 | 0.077 | 0.218 | 0.026 | 0.134 | 0.209 | 0.054 | 0.098 | 0.059 | 0.004 | 0.010 | 0.004 | 0.087 | 0.110 | 0.077 | 0.000 | 0.004 | 0.010 | 0.048 | 0.004 | 0.000 |
| 40 | 2,2,4-Trimethyl-1,3-pentanediol diisobutyrate | 6846-50-0 | 0.094 | 0.027 | 0.015 | 0.037 | 0.033 | 0.000 | 0.045 | 0.000 | 0.029 | 0.014 | 0.029 | 0.016 | 0.000 | 0.002 | 0.001 | 0.000 | 0.012 | 0.008 | 0.006 | 0.048 | 0.141 | 0.015 | 0.001 | 0.000 |
| 41 | Nonane, 3,7-dimethyl- | 17302-32-8 | n.d. | n.d. | n.d. | 0.161 | 0.058 | 0.000 | 0.000 | 0.005 | 0.011 | 0.003 | 0.013 | 0.000 | 0.000 | 0.001 | 0.000 | 0.011 | 0.000 | 0.012 | 0.001 | 0.005 | 0.022 | 0.025 | 0.001 | 0.011 |
| 42 | Cedrol | 77-53-2 | 0.003 | 0.013 | 0.000 | 0.000 | 0.020 | 0.043 | 0.018 | 0.028 | 0.015 | 0.018 | 0.028 | 0.015 | 0.000 | 0.002 | 0.001 | 0.014 | 0.017 | 0.014 | n.d. | n.d. | n.d. | 0.015 | 0.001 | 0.009 |
| 43 | 3-Ethyl-3-methylheptane | 17302-01-1 | n.d. | n.d. | n.d. | 0.000 | n.d. | n.d. | n.d. | 0.000 | n.d. | n.d. | n.d. | 0.000 | n.d. | n.d. | n.d. | 0.002 | 0.000 | 0.002 | 0.000 | 0.001 | 0.009 | n.d. | n.d. | 0.000 |
| 44 | Dodecane, 2,6,10-trimethyl- | 3891-98-3 | n.d. | n.d. | n.d. | 0.000 | n.d. | n.d. | n.d. | 0.000 | n.d. | 0.020 | 0.026 | 0.005 | 0.000 | 0.002 | 0.000 | 0.009 | 0.015 | 0.000 | 0.000 | 0.008 | 0.017 | n.d. | n.d. | 0.000 |
| 45 | Pentadecane, 2,6,10,14-tetramethyl- | 1921-70-6 | 0.074 | 0.028 | 0.000 | 0.000 | 0.065 | 0.086 | n.d. | 0.000 | n.d. | n.d. | n.d. | 0.000 | n.d. | n.d. | n.d. | 0.006 | 0.009 | 0.000 | 0.001 | 0.005 | 0.018 | 0.025 | 0.001 | 0.011 |
| 46 | Hexadecane, 2,6,10,14-tetramethyl- | 638-36-8 | 0.080 | 0.044 | 0.034 | 0.592 | 0.224 | 0.000 | 0.344 | 0.024 | 0.053 | 0.027 | 0.035 | 0.029 | 0.000 | 0.004 | 0.001 | 0.002 | 0.000 | 0.002 | 0.000 | 0.002 | 0.003 | 0.025 | 0.001 | 0.014 |
| 47 | 1,2-Benzenedicarboxylic acid, bis(2-methylpropyl) ester | 84-69-5 | 0.111 | 0.066 | 0.053 | 0.779 | 0.349 | 0.282 | 0.629 | 0.055 | 0.122 | 0.049 | 0.061 | 0.027 | 0.001 | 0.005 | 0.001 | 0.222 | 0.220 | 0.082 | 0.001 | 0.015 | 0.062 | 0.038 | 0.002 | 0.021 |

**Table S2** Concentrations, ODT and OAV for selected odorants in tea samples

**Table S2 (Continued)** Concentrations, ODT, and OAV for selected odorants in tea samples

| **No.** | **Compounds** | **OT**  **(mg/kg)** | **Reference** | **OAV** | | | | | | | | | | | | | | | | | | | | | | | |
| --- | --- | --- | --- | --- | --- | --- | --- | --- | --- | --- | --- | --- | --- | --- | --- | --- | --- | --- | --- | --- | --- | --- | --- | --- | --- | --- | --- |
| **RM** | | | **P1** | | | **P2** | | | **P3** | | | **P4** | | | **P5** | | | **P6** | | | **RP** | | |
| **1** | **2** | **3** | **1** | **2** | **3** | **1** | **2** | **3** | **1** | **2** | **3** | **1** | **2** | **3** | **1** | **2** | **3** | **1** | **2** | **3** | **1** | **2** | **3** |
| 1 | 1-Pentanol | 0.1502 | Czemy et al. (2000) | 0.299 | n.a.b | 0.157 | n.a. | n.a. | n.a. | n.a. | n.a. | n.a. | n.a. | n.a. | n.a. | n.a. | n.a. | n.a. | n.a. | n.a. | n.a. | n.a. | n.a. | n.a. | n.a. | n.a. | n.a. |
| 2 | Hexanal | 0.0615 | Burdack-Freitag et al. (2012) | 0.239 | 0.235 | 0.210 | n.a. | 3.558 | 1.166 | 0.948 | 1.543 | 1.786 | 0.515 | 0.524 | 0.271 | n.a. | n.a. | n.a. | 0.998 | 0.813 | 0.976 | 0.049 | 0.524 | 1.632 | n.a. | n.a. | n.a. |
| 3 | Hexane, 2,3,4-trimethyl- | n.f.c | n.f. | n.a. | n.a. | n.a. | n.a. | n.a. | n.a. | n.a. | n.a. | n.a. | n.a. | n.a. | n.a. | n.a. | n.a. | n.a. | n.a. | n.a. | n.a. | n.a. | n.a. | n.a. | n.a. | n.a. | n.a. |
| 4 | 2-Heptanol | 0.065235 | Van Gemert, L. J. (2011) | n.a. | n.a. | n.a. | n.a. | 3.075 | 1.010 | 0.412 | 1.174 | 0.835 | n.a. | n.a. | n.a. | n.a. | n.a. | n.a. | n.a. | n.a. | n.a. | n.a. | n.a. | n.a. | n.a. | n.a. | n.a. |
| 5 | Ethanone, 1-(3-methylenecyclopentyl)- | n.f. | n.f. | n.a. | n.a. | n.a. | n.a. | n.a. | n.a. | n.a. | n.a. | n.a. | n.a. | n.a. | n.a. | n.a. | n.a. | n.a. | n.a. | n.a. | n.a. | n.a. | n.a. | n.a. | n.a. | n.a. | n.a. |
| 6 | 2-Hexene, 3,5,5-trimethyl- | n.f. | n.f. | n.a. | n.a. | n.a. | n.a. | n.a. | n.a. | n.a. | n.a. | n.a. | n.a. | n.a. | n.a. | n.a. | n.a. | n.a. | n.a. | n.a. | n.a. | n.a. | n.a. | n.a. | n.a. | n.a. | n.a. |
| 7 | 1-Octen-3-ol | 0.0015 | Van Gemert, L. J. (2011) | 150.747 | 239.809 | 202.837 | n.a. | n.a. | n.a. | n.a. | n.a. | n.a. | n.a. | n.a. | n.a. | n.a. | n.a. | n.a. | n.a. | n.a. | n.a. | n.a. | n.a. | n.a. | n.a. | n.a. | n.a. |
| 8 | 2-Octen-1-ol, (E)- | 0.02 | Takahashi et al. (1989) | n.a. | n.a. | n.a. | n.a. | n.a. | n.a. | n.a. | 0.966 | 1.341 | n.a. | n.a. | n.a. | n.a. | n.a. | n.a. | 1.772 | 1.601 | 0.922 | 0.107 | n.a. | 1.549 | n.a. | n.a. | n.a. |
| 9 | 2-Isopropylidene-5-methylhex-4-enal | n.f. | n.f. | n.a. | n.a. | n.a. | n.a. | n.a. | n.a. | n.a. | n.a. | n.a. | n.a. | n.a. | n.a. | n.a. | n.a. | n.a. | n.a. | n.a. | n.a. | n.a. | n.a. | n.a. | n.a. | n.a. | n.a. |
| 10 | Cyclohexene, 1-methyl-4-(1-methylethenyl) | 0.5 | Boonbumrung et al. (2001) | n.a. | n.a. | n.a. | n.a. | 0.032 | 0.099 | n.a. | 0.023 | 0.045 | n.a. | n.a. | n.a. | n.a. | n.a. | n.a. | n.a. | n.a. | n.a. | n.a. | n.a. | n.a. | n.a. | n.a. | n.a. |
| 11 | Cyclohexanone, 2,2,6-trimethyl- | n.f. | n.f. | n.a. | n.a. | n.a. | n.a. | n.a. | n.a. | n.a. | n.a. | n.a. | n.a. | n.a. | n.a. | n.a. | n.a. | n.a. | n.a. | n.a. | n.a. | n.a. | n.a. | n.a. | n.a. | n.a. | n.a. |
| 12 | Decane, 3,7-dimethyl- | n.f. | n.f. | n.a. | n.a. | n.a. | n.a. | n.a. | n.a. | n.a. | n.a. | n.a. | n.a. | n.a. | n.a. | n.a. | n.a. | n.a. | n.a. | n.a. | n.a. | n.a. | n.a. | n.a. | n.a. | n.a. | n.a. |
| 13 | Isophorone | 11 | Pelosi & Pisanelli (1981) | 0.001 | 0.003 | 0.002 | n.a. | n.a. | n.a. | n.a. | n.a. | n.a. | n.a. | n.a. | n.a. | n.a. | n.a. | n.a. | n.a. | n.a. | n.a. | n.a. | n.a. | n.a. | n.a. | n.a. | n.a. |
| 14 | 7-Octen-2-ol, 2-methyl-6-methylene- | n.f. | n.f. | n.a. | n.a. | n.a. | n.a. | n.a. | n.a. | n.a. | n.a. | n.a. | n.a. | n.a. | n.a. | n.a. | n.a. | n.a. | n.a. | n.a. | n.a. | n.a. | n.a. | n.a. | n.a. | n.a. | n.a. |
| 15 | trans-Linalool oxide (furanoid) | 6 | Ribereau-Gayon (1978) | n.a. | n.a. | n.a. | 0.039 | 0.593 | 0.440 | 0.078 | 0.257 | 0.496 | 0.141 | 0.309 | 0.181 | 0.005 | 0.036 | 0.009 | 0.154 | 0.185 | 0.133 | 0.006 | 0.077 | 0.284 | 0.031 | 0.002 | 0.021 |
| 16 | trans-Linalool oxide (furanoid) | 0.06 | Ong & Acree (1998) | n.a. | n.a. | n.a. | 10.345 | 145.921 | 117.190 | 18.206 | 62.324 | 121.688 | 36.195 | 77.392 | 46.345 | 1.087 | 8.394 | 1.943 | 41.937 | 49.957 | 36.073 | 1.410 | 21.987 | 80.072 | 10.754 | 0.701 | 7.523 |
| 17 | Linalool | 0.006 | Pino & Mesa (2011) | 36.578 | 67.207 | 52.274 | 94.476 | 3513.775 | 994.853 | 186.855 | 900.815 | 1300.883 | 160.475 | 353.417 | 194.092 | 16.399 | 95.306 | 29.978 | 184.114 | 228.863 | 126.244 | 6.840 | 42.781 | 174.143 | 5.620 | 0.725 | 5.323 |
| 18 | 2H-Pyran-3(4H)-one, 6-ethenyldihydro-2,2,6-trimethyl- | n.f. | n.f. | n.a. | n.a. | n.a. | n.a. | n.a. | n.a. | n.a. | n.a. | n.a. | n.a. | n.a. | n.a. | n.a. | n.a. | n.a. | n.a. | n.a. | n.a. | n.a. | n.a. | n.a. | n.a. | n.a. | n.a. |
| 19 | 1-Methylcycloheptanol | n.f. | n.f. | n.a. | n.a. | n.a. | n.a. | n.a. | n.a. | n.a. | n.a. | n.a. | n.a. | n.a. | n.a. | n.a. | n.a. | n.a. | n.a. | n.a. | n.a. | n.a. | n.a. | n.a. | n.a. | n.a. | n.a. |
| 20 | 1H-Pyrazole, 4,5-dihydro-5,5-dimethyl-4-isopropylidene- | n.f. | n.f. | n.a. | n.a. | n.a. | n.a. | n.a. | n.a. | n.a. | n.a. | n.a. | n.a. | n.a. | n.a. | n.a. | n.a. | n.a. | n.a. | n.a. | n.a. | n.a. | n.a. | n.a. | n.a. | n.a. | n.a. |
| 21 | Benzene, 1,2-dimethoxy- | 0.00371 | Pang et al. (2019) | n.a. | n.a. | n.a. | n.a. | n.a. | n.a. | 11.956 | 58.417 | 76.725 | 211.716 | 361.562 | 209.740 | 22.196 | 139.925 | 38.296 | 571.690 | 701.568 | 458.401 | 28.872 | 334.505 | 1272.322 | 173.224 | 13.500 | 154.152 |
| 22 | (3R,6S)-2,2,6-Trimethyl-6-vinyltetrahydro-2H-pyran-3-ol | 3 | Ribereau-Gayon (1978) | n.a. | n.a. | n.a. | 0.016 | n.a. | 0.175 | 0.031 | 0.139 | 0.272 | 0.074 | 0.120 | 0.066 | 0.002 | 0.012 | 0.003 | 0.062 | 0.074 | 0.053 | 0.001 | 0.025 | 0.090 | 0.018 | 0.001 | 0.010 |
| 23 | Benzene, 1,3-bis(1-methylethyl)- | n.f. | n.f. | n.a. | n.a. | n.a. | n.a. | n.a. | n.a. | n.a. | n.a. | n.a. | n.a. | n.a. | n.a. | n.a. | n.a. | n.a. | n.a. | n.a. | n.a. | n.a. | n.a. | n.a. | n.a. | n.a. | n.a. |
| 24 | (3R,6S)-2,2,6-Trimethyl-6-vinyltetrahydro-2H-pyran-3-ol | 3 | Ribereau-Gayon (1978) | 0.006 | 0.012 | 0.013 | 0.040 | 0.535 | 0.430 | 0.097 | 0.445 | 0.868 | 0.267 | 0.468 | 0.271 | 0.006 | 0.047 | 0.000 | 0.262 | 0.300 | 0.220 | 0.005 | 0.084 | 0.309 | 0.033 | 0.002 | 0.023 |
| 25 | Terpinen-4-ol | 0.59 | Schieberle & Grosch (1998) | n.a. | n.a. | n.a. | n.a. | 0.128 | 0.133 | 0.017 | 0.120 | 0.061 | 0.045 | 0.025 | 0.055 | 0.003 | 0.014 | 0.003 | 0.066 | 0.100 | 0.056 | 0.002 | 0.020 | 0.101 | 0.026 | 0.001 | 0.015 |
| 26 | .alpha.-Terpineol | 0.3 | Van Gemert, L. J. (2011) | 0.049 | n.a. | 0.039 | 0.255 | 4.470 | 1.744 | 0.587 | 4.146 | 6.198 | 1.189 | 2.823 | 1.390 | 0.094 | 0.617 | 0.165 | 2.066 | 2.526 | 1.488 | 0.074 | 0.709 | 2.746 | 0.457 | 0.033 | 0.382 |
| 27 | 1,3-Cyclohexadiene-1-carboxaldehyde, 2,6,6-trimethyl- | n.f. | n.f. | n.a. | n.a. | n.a. | n.a. | n.a. | n.a. | n.a. | n.a. | n.a. | n.a. | n.a. | n.a. | n.a. | n.a. | n.a. | n.a. | n.a. | n.a. | n.a. | n.a. | n.a. | n.a. | n.a. | n.a. |
| 28 | 1-Cyclohexene-1-carboxaldehyde, 2,6,6-trimethyl- | 0.003 | Rashash et al. (1997) | 13.636 | 28.913 | 23.873 | n.a. | 59.527 | 15.670 | 2.983 | 18.538 | 27.255 | n.a. | n.a. | n.a. | 0.588 | 2.486 | 1.105 | n.a. | n.a. | n.a. | n.a. | n.a. | n.a. | n.a. | n.a. | n.a. |
| 29 | 4-Methyleneisophorone | n.f. | n.f. | n.a. | n.a. | n.a. | n.a. | n.a. | n.a. | n.a. | n.a. | n.a. | n.a. | n.a. | n.a. | n.a. | n.a. | n.a. | n.a. | n.a. | n.a. | n.a. | n.a. | n.a. | n.a. | n.a. | n.a. |
| 30 | Bicyclo[2.2.1]hept-2-ene, 1,7,7-trimethyl- | n.f. | n.f. | n.a. | n.a. | n.a. | n.a. | n.a. | n.a. | n.a. | n.a. | n.a. | n.a. | n.a. | n.a. | n.a. | n.a. | n.a. | n.a. | n.a. | n.a. | n.a. | n.a. | n.a. | n.a. | n.a. | n.a. |
| 31 | 1,2,3-Trimethoxybenzene | 0.00075 | Pang et al. (2019) | n.a. | n.a. | n.a. | 37.845 | 21.574 | n.a. | 46.922 | 117.745 | 129.172 | 1651.832 | 2952.356 | 1708.135 | 122.771 | 747.266 | 232.667 | 4399.281 | 5223.643 | 3605.908 | 148.048 | 2177.058 | 8136.289 | 1680.479 | 101.319 | 1477.279 |
| 32 | 2-Methoxy-4,4-dimethyl-2-cyclohexen-1-one | n.f. | n.f. | n.a. | n.a. | n.a. | n.a. | n.a. | n.a. | n.a. | n.a. | n.a. | n.a. | n.a. | n.a. | n.a. | n.a. | n.a. | n.a. | n.a. | n.a. | n.a. | n.a. | n.a. | n.a. | n.a. | n.a. |
| 33 | 2H-2,4a-Methanonaphthalene, 1,3,4,5,6,7-hexahydro-1,1,5,5-tetramethyl-, (2S)- | n.f. | n.f. | n.a. | n.a. | n.a. | n.a. | n.a. | n.a. | n.a. | n.a. | n.a. | n.a. | n.a. | n.a. | n.a. | n.a. | n.a. | n.a. | n.a. | n.a. | n.a. | n.a. | n.a. | n.a. | n.a. | n.a. |
| 34 | Decanoic acid, ethyl ester | n.f. | n.f. | n.a. | n.a. | n.a. | n.a. | n.a. | n.a. | n.a. | n.a. | n.a. | n.a. | n.a. | n.a. | n.a. | n.a. | n.a. | n.a. | n.a. | n.a. | n.a. | n.a. | n.a. | n.a. | n.a. | n.a. |
| 35 | alpha.-Ionone | 0.00378 | Plotto et al. (2006) | 5.055 | 3.305 | 2.594 | n.a. | n.a. | n.a. | 0.000 | 13.933 | 15.872 | 13.228 | 10.006 | 4.751 | 0.159 | 3.606 | 0.283 | 3.196 | 3.597 | 7.168 | 0.171 | 1.363 | 2.845 | 10.473 | 0.143 | 5.825 |
| 36 | 2-Butanone, 4-(2,6,6-trimethyl-1-cyclohexen-1-yl)- | 0.0017 | Brennand et al. (1989) | n.a. | n.a. | n.a. | n.a. | n.a. | n.a. | 3.104 | 46.442 | 70.211 | 11.620 | 19.120 | 11.557 | 0.553 | 4.801 | 0.926 | 11.711 | 14.674 | 13.669 | 0.529 | 4.661 | 16.676 | 11.950 | 0.537 | 8.296 |
| 37 | trans-.beta.-Ionone | 0.00021 | Pino & Mesa (2011) | 78.685 | 74.773 | 59.130 | 0.000 | 179.517 | 0.000 | 24.353 | 101.595 | 176.713 | 84.630 | 40.150 | 22.851 | 3.424 | 16.989 | 5.275 | 55.054 | 63.541 | 132.727 | 3.647 | 25.472 | 87.146 | 43.979 | 2.899 | 34.153 |
| 38 | 3-Buten-2-one, 4-(2,2,6-trimethyl-7-oxabicyclo[4.1.0]hept-1-yl)- | n.f. | n.f. | n.a. | n.a. | n.a. | n.a. | n.a. | n.a. | n.a. | n.a. | n.a. | n.a. | n.a. | n.a. | n.a. | n.a. | n.a. | n.a. | n.a. | n.a. | n.a. | n.a. | n.a. | n.a. | n.a. | n.a. |
| 39 | Phenol, 3,5-bis(1,1-dimethylethyl)- | n.f. | n.f. | n.a. | n.a. | n.a. | n.a. | n.a. | n.a. | n.a. | n.a. | n.a. | n.a. | n.a. | n.a. | n.a. | n.a. | n.a. | n.a. | n.a. | n.a. | n.a. | n.a. | n.a. | n.a. | n.a. | n.a. |
| 40 | 2,2,4-Trimethyl-1,3-pentanediol diisobutyrate | n.f. | n.f. | n.a. | n.a. | n.a. | n.a. | n.a. | n.a. | n.a. | n.a. | n.a. | n.a. | n.a. | n.a. | n.a. | n.a. | n.a. | n.a. | n.a. | n.a. | n.a. | n.a. | n.a. | n.a. | n.a. | n.a. |
| 41 | Nonane, 3,7-dimethyl- | n.f. | n.f. | n.a. | n.a. | n.a. | n.a. | n.a. | n.a. | n.a. | n.a. | n.a. | n.a. | n.a. | n.a. | n.a. | n.a. | n.a. | n.a. | n.a. | n.a. | n.a. | n.a. | n.a. | n.a. | n.a. | n.a. |
| 42 | Cedrol | n.f. | n.f. | n.a. | n.a. | n.a. | n.a. | n.a. | n.a. | n.a. | n.a. | n.a. | n.a. | n.a. | n.a. | n.a. | n.a. | n.a. | n.a. | n.a. | n.a. | n.a. | n.a. | n.a. | n.a. | n.a. | n.a. |
| 43 | 3-Ethyl-3-methylheptane | n.f. | n.f. | n.a. | n.a. | n.a. | n.a. | n.a. | n.a. | n.a. | n.a. | n.a. | n.a. | n.a. | n.a. | n.a. | n.a. | n.a. | n.a. | n.a. | n.a. | n.a. | n.a. | n.a. | n.a. | n.a. | n.a. |
| 44 | Dodecane, 2,6,10-trimethyl- | n.f. | n.f. | n.a. | n.a. | n.a. | n.a. | n.a. | n.a. | n.a. | n.a. | n.a. | n.a. | n.a. | n.a. | n.a. | n.a. | n.a. | n.a. | n.a. | n.a. | n.a. | n.a. | n.a. | n.a. | n.a. | n.a. |
| 45 | Pentadecane, 2,6,10,14-tetramethyl- | n.f. | n.f. | n.a. | n.a. | n.a. | n.a. | n.a. | n.a. | n.a. | n.a. | n.a. | n.a. | n.a. | n.a. | n.a. | n.a. | n.a. | n.a. | n.a. | n.a. | n.a. | n.a. | n.a. | n.a. | n.a. | n.a. |
| 46 | Hexadecane, 2,6,10,14-tetramethyl- | n.f. | n.f. | n.a. | n.a. | n.a. | n.a. | n.a. | n.a. | n.a. | n.a. | n.a. | n.a. | n.a. | n.a. | n.a. | n.a. | n.a. | n.a. | n.a. | n.a. | n.a. | n.a. | n.a. | n.a. | n.a. | n.a. |
| 47 | 1,2-Benzenedicarboxylic acid, bis(2-methylpropyl) ester | n.f. | n.f. | n.a. | n.a. | n.a. | n.a. | n.a. | n.a. | n.a. | n.a. | n.a. | n.a. | n.a. | n.a. | n.a. | n.a. | n.a. | n.a. | n.a. | n.a. | n.a. | n.a. | n.a. | n.a. | n.a. | n.a. |

**Table S2 (Continued)** Concentrations, ODT, and OAV for selected odorants in tea samples

| an.d. | not detectable | | | |  |  |  |  |  |  |  |  |  |  |  |  |  |  |  |  |  |  |  |  |  |  |
| --- | --- | --- | --- | --- | --- | --- | --- | --- | --- | --- | --- | --- | --- | --- | --- | --- | --- | --- | --- | --- | --- | --- | --- | --- | --- | --- |
| bn.a. | not available due to lack of quantitative data | | | |  |  |  |  |  |  |  |  |  |  |  |  |  |  |  |  |  |  |  |  |  |  |
| cn.f. | not yet found | | | | |  |  |  |  |  |  |  |  |  |  |  |  |  |  |  |  |  |  |  |  |  |
|  |  |  |  |  |  |  |  |  |  |  |  |  |  |  |  |  |  |  |  |  |  |  |  |  |  |  |
| Boonbumrung et al. (2001) | The Volatile Constituents in the Peel and Pulp of a Green Thai Mango, Khieo Sawoei Cultivar (Mangifera indica L.) | | | | | | | | | | | | | |  |  |  |  |  |  |  |  |  |  |  |  |
| Brennand et al. (1989) | Aroma properties and thresholds of some branched-chain and other minor volatile fatty acids occurring in milkfat and meat lipids | | | | | | | | | | | | | |  |  |  |  |  |  |  |  |  |  |  |  |
| Burdack-Freitag et al. (2012) | Characterization of the key odorants in raw Italian hazelnuts ( Corylus avellana L. var. Tonda Romana) and roasted hazelnut paste by means of molecular sensory science | | | | | | | | | | | | | |  |  |  |  |  |  |  |  |  |  |  |  |
| Czemy et al. (2000) | Potent odorants of raw Arabica coffee. Their changes during roasting | | | | | | | | | | | | | |  |  |  |  |  |  |  |  |  |  |  |  |
| Van Gemert, L. J. (2011) | Odour thresholds: Compilations of odour threshold values in air, water and other media | | | | | | | | | | | | | |  |  |  |  |  |  |  |  |  |  |  |  |
| Ong & Acree (1998) | Gas Chromatography/Olfactory analysis of Lychee (*Litchi chinesis Sonn*.) | | | | | | | | | | | | | |  |  |  |  |  |  |  |  |  |  |  |  |
| Pang et al. (2019) | Comparison of Potent Odorants in Raw and Ripened Pu-Erh Tea Infusions Based on Odor Activity Value Calculation and Multivariate Analysis: Understanding the Role of Pile Fermentation | | | | | | | | | | | | | |  |  |  |  |  |  |  |  |  |  |  |  |
| Pelosi & Pisanelli (1981) | Specific anosmia to 1,8-cineole: the camphor primary odour | | | | | | | | | | | | | |  |  |  |  |  |  |  |  |  |  |  |  |
| Pino & Mesa (2011) | Characterization of odor-active compounds in mango ‘Ataulfo’ (Mangifera indica L.) fruit | | | | | | | | | | | | | |  |  |  |  |  |  |  |  |  |  |  |  |
| Plotto et al. (2006) | Specific anosmia observed for *β*-ionone, but not for *α*-ionone: Significance for flavor research | | | | | | | | | | | | | |  |  |  |  |  |  |  |  |  |  |  |  |
| Rashash et al. (1997) | FPA of selected odorous compounds | | | | | | | | | | | | | |  |  |  |  |  |  |  |  |  |  |  |  |
| Ribereau-Gayon (1978) | Wine flavor：In G. Charalambous & G.E. Inglett (Eds), Flavor of foods and beverages: Chemistry and technology | | | | | | | | | | | | | |  |  |  |  |  |  |  |  |  |  |  |  |
| Schieberle & Grosch (1998) | Compilation of odor thresholds, odor qualities and retention indices of key food odorants | | | | | | | | | | | | | |  |  |  |  |  |  |  |  |  |  |  |  |
| Takahashi et al. (1989) | Standardized olfactometries in Japan—a review over ten years | | | | | | | | | | | | | |  |  |  |  |  |  |  |  |  |  |  |  |

**Table S3** Standard curve for methoxy-phenolic compounds

| **Name** | **Concentration** | **Retention time (min)** | **Peak area (pA*min)** |
| --- | --- | --- | --- |
| 1,2-dimethoxybenzene-1 | 10ppm | 20.257 | 105.896 |
| 1,2-dimethoxybenzene-2 | 50ppm | 20.43 | 357.217 |
| 1,2-dimethoxybenzene-3 | 100ppm | 20.448 | 785.0001 |
| 1,2-dimethoxybenzene-4 | 150ppm | 20.52 | 1086.4738 |
| 1,2-dimethoxybenzene-5 | 200ppm | 20.77 | 1603.2784 |
| 1,2,3-trimethoxybenzene-1 | 10ppm | 23.875 | 75.5262 |
| 1,2,3-trimethoxybenzene-2 | 50ppm | 24.015 | 303.4739 |
| 1,2,3-trimethoxybenzene-3 | 100ppm | 24.042 | 446.9751 |
| 1,2,3-trimethoxybenzene-4 | 150ppm | 24.185 | 863.959 |
| 1,2,3-trimethoxybenzene-5 | 200ppm | 24.243 | 1177.1228 |

y = 7.7723x - 5.1999, R² = 0.9926 (1,2-dimethoxybenzene)

y = 5.7714x - 15.276, R² = 0.9786 (1,2,3-trimethoxybenzene)

| **Quality-controlled sequences** | | | | | | |
| --- | --- | --- | --- | --- | --- | --- |
| **Samples** | **Clean reads** | **Clean base(bp)** | **Percent in raw reads(%)** | | **Percent in raw bases(%)** | |
| P2-1 | 44570406 | 6700482641 | 99.090 | | 98.653 | |
| P2-2 | 44052320 | 6626912486 | 99.234 | | 98.861 | |
| P2-3 | 43548472 | 6548036350 | 99.196 | | 98.777 | |
| P3-1 | 49619174 | 7475298761 | 99.331 | | 99.103 | |
| P3-2 | 48117436 | 7250380873 | 99.303 | | 99.093 | |
| P3-3 | 48203634 | 7258021790 | 99.333 | | 99.050 | |
| P4-1 | 50216684 | 7562655402 | 99.198 | | 98.936 | |
| P4-2 | 46122152 | 6945198944 | 99.225 | | 98.950 | |
| P4-3 | 46587364 | 7017111570 | 99.266 | | 99.018 | |
| P5-1 | 41889410 | 6309046718 | 99.181 | | 98.926 | |
| P5-2 | 41919450 | 6312648663 | 99.158 | | 98.889 | |
| P5-3 | 49922936 | 7520271694 | 99.269 | | 99.031 | |
| RP-1 | 45341466 | 6835121191 | 99.219 | | 99.053 | |
| RP-2 | 49546968 | 7469662385 | 99.240 | | 99.081 | |
| RP-3 | 50442114 | 7603651800 | 99.164 | | 98.993 | |
| **Assembly results** | | | | | | |
| **Sample** | **Contigs** | **Contigs bases(bp)** | **N50(bp)** | **N90(bp)** | **Max(bp)** | **Min(bp)** |
| P2-1 | 481363 | 397670117 | 993 | 364 | 949789 | 300 |
| P2-2 | 572474 | 429657044 | 783 | 354 | 589176 | 300 |
| P2-3 | 522033 | 410666454 | 885 | 360 | 616566 | 300 |
| P3-1 | 366485 | 375166969 | 1650 | 392 | 612005 | 300 |
| P3-2 | 328529 | 354386931 | 1867 | 400 | 612132 | 300 |
| P3-3 | 424892 | 396569030 | 1311 | 377 | 501941 | 300 |
| P4-1 | 327731 | 375243923 | 2980 | 404 | 612142 | 300 |
| P4-2 | 313131 | 361345414 | 3326 | 401 | 612014 | 300 |
| P4-3 | 298908 | 352614859 | 3670 | 402 | 612143 | 300 |
| P5-1 | 283522 | 312863833 | 2145 | 404 | 612143 | 300 |
| P5-2 | 286510 | 316013689 | 2252 | 400 | 612148 | 300 |
| P5-3 | 322967 | 353873966 | 2335 | 401 | 612139 | 300 |
| RP-1 | 204317 | 240249888 | 1908 | 428 | 612144 | 300 |
| RP-2 | 210941 | 248982786 | 1999 | 427 | 612017 | 300 |
| RP-3 | 200949 | 245392517 | 2058 | 438 | 612017 | 300 |
| **Gene prediction results** | | | | | | |
| **Sample** | **ORFs** | **Total Length(bp)** | **Average Length(bp)** | | **Max(bp)** | **Min(bp)** |
| P2-1 | 582415 | 249367296 | 428.16 | | 14778 | 102 |
| P2-2 | 607471 | 245115756 | 403.5 | | 14778 | 102 |
| P2-3 | 603949 | 252507960 | 418.09 | | 14778 | 102 |
| P3-1 | 522798 | 244527942 | 467.73 | | 16800 | 102 |
| P3-2 | 490404 | 233548002 | 476.24 | | 16800 | 102 |
| P3-3 | 560198 | 253586139 | 452.67 | | 16800 | 102 |
| P4-1 | 500317 | 242860608 | 485.41 | | 16800 | 102 |
| P4-2 | 481480 | 233707131 | 485.39 | | 16800 | 102 |
| P4-3 | 468600 | 229456245 | 489.66 | | 16800 | 102 |
| P5-1 | 428198 | 206901186 | 483.19 | | 16800 | 102 |
| P5-2 | 431262 | 208081497 | 482.49 | | 16800 | 102 |
| P5-3 | 484041 | 233432874 | 482.26 | | 16800 | 102 |
| RP-1 | 339892 | 171277011 | 503.92 | | 16800 | 102 |
| RP-2 | 351755 | 179094423 | 509.15 | | 16800 | 102 |
| RP-3 | 341704 | 175006257 | 512.16 | | 16800 | 102 |
| **The number and length of genes before and after redundancy removal** | | | | | | |
| **Genes** | **Total length (bp)** | **Average length (bp)** | **Catalog genes** | **Catalog total length (bp)** | **Catalog average length (bp)** | |
| 12545167 | 6097309863 | 486.03 | 1920835 | 905515491 | 471.42 | |

**Table S4** Statistics of sequencing data


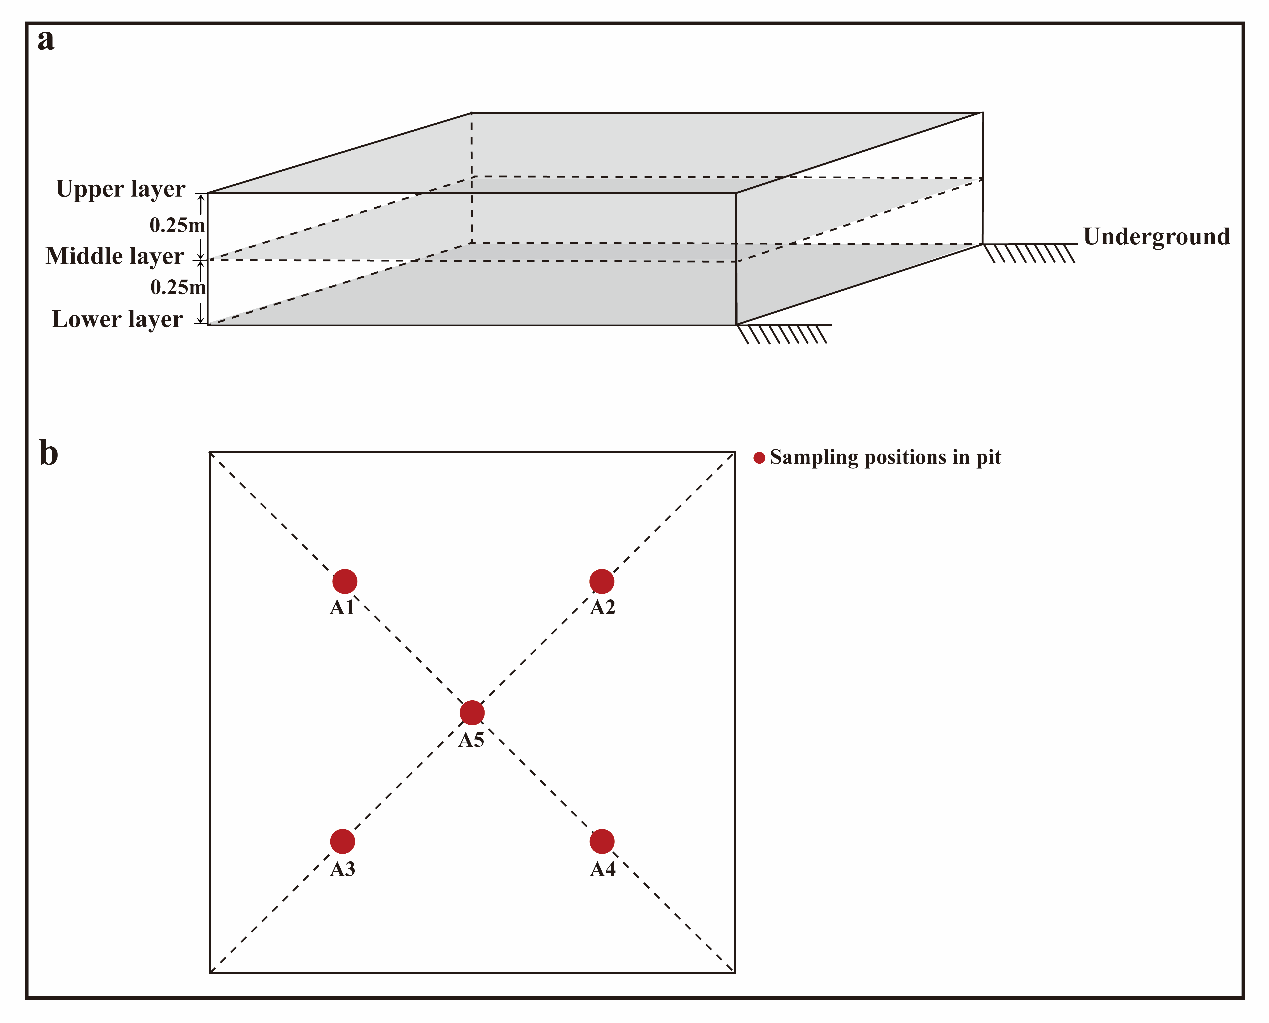
**Fig. S1** Sampling points of the tea fermentation pile. (a, different layers of the tea fermentation pile; b, Specific sampling points within each layer.)


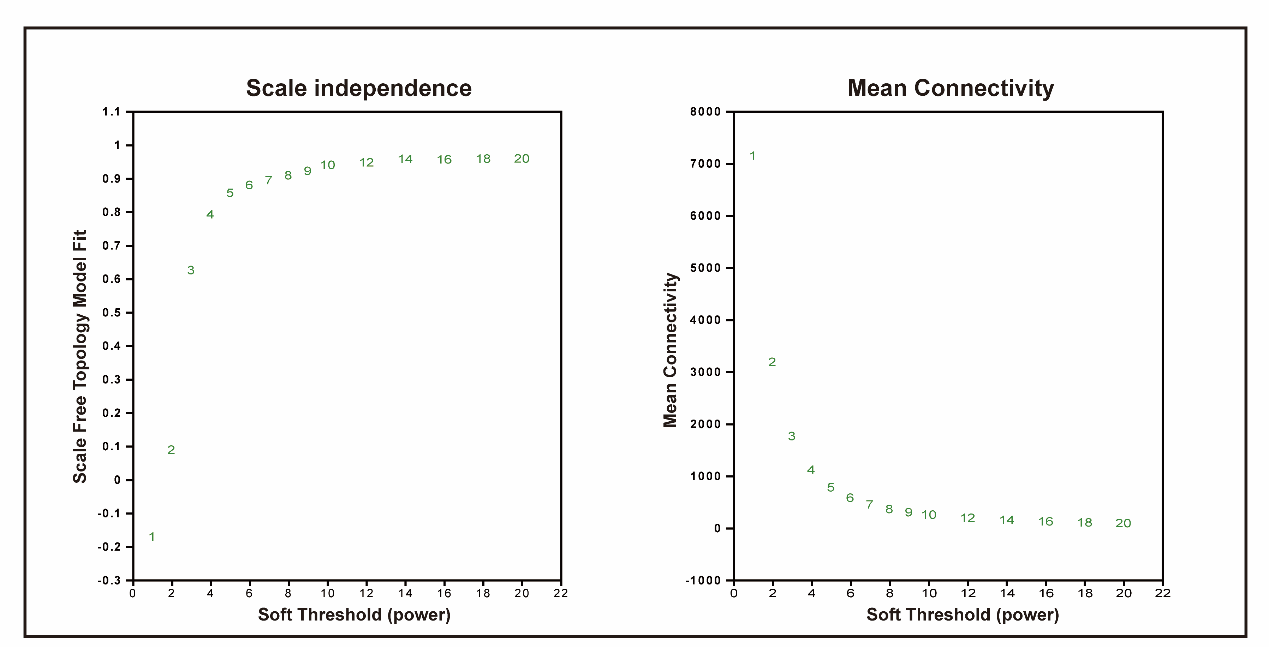
**Fig. S2** Scale free topology fit and mean connectivity curves for network soft threshold in WGCNA
